# Supplementary material for: Spectroscopy and photochemistry of copper nitrate clusters
Source: Royal Society of Chemistry journal article supplement (doi:10.1039/d1cp00629k), 2021-01-01
Supplement: d1cp00629k1.pdf [file d1cp00629k1.pdf]

# Electronic Supplementary Information

for

## Spectroscopy and Photochemistry of Copper Nitrate Clusters

*Tobias F. Pascher, Milan Ončák\*, Christian van der Linde and Martin K. Beyer\**

Institut für Ionen und Angewandte Physik, Universität Innsbruck, Technikerstraße 25, 6020

Innsbruck, Austria

### **Corresponding Author**

\*E-mail: [Milan.Oncak@uibk.ac.at](mailto:Milan.Oncak@uibk.ac.at), [Martin.Beyer@uibk.ac.at](mailto:Martin.Beyer@uibk.ac.at)

## Complete Partial Cross Sections

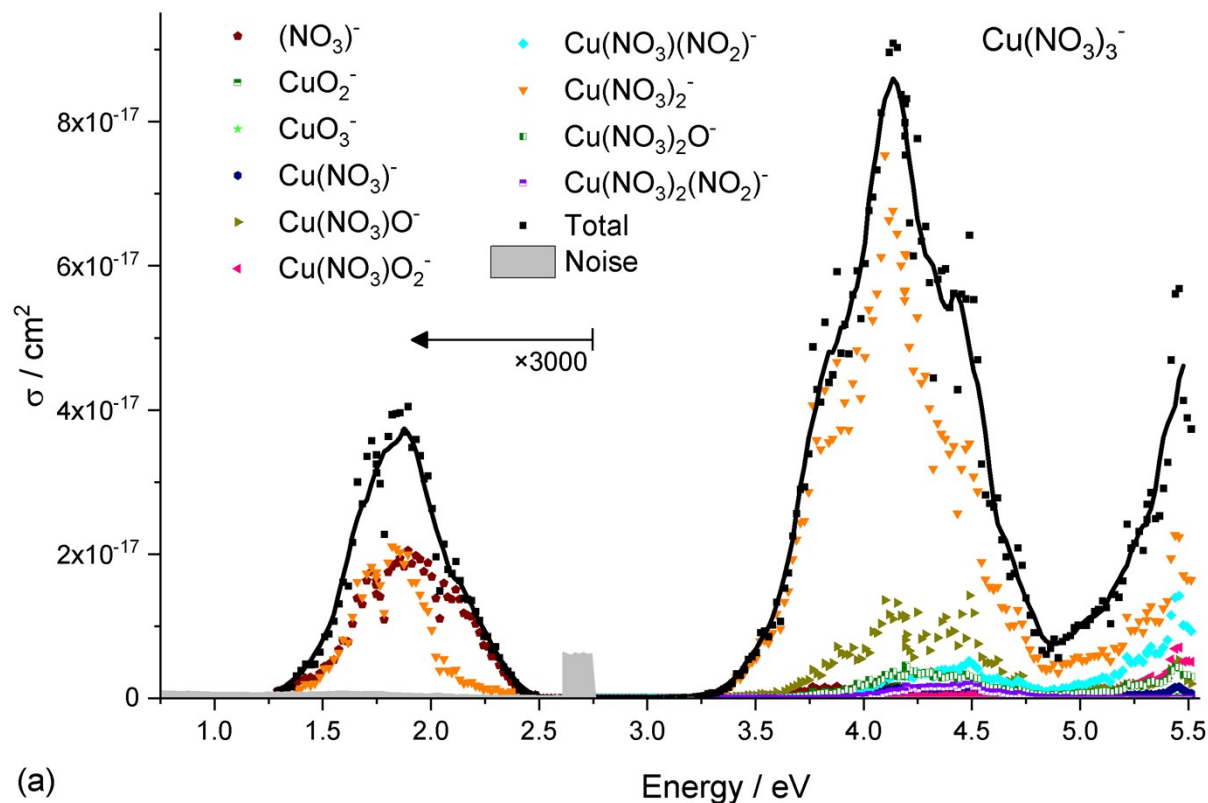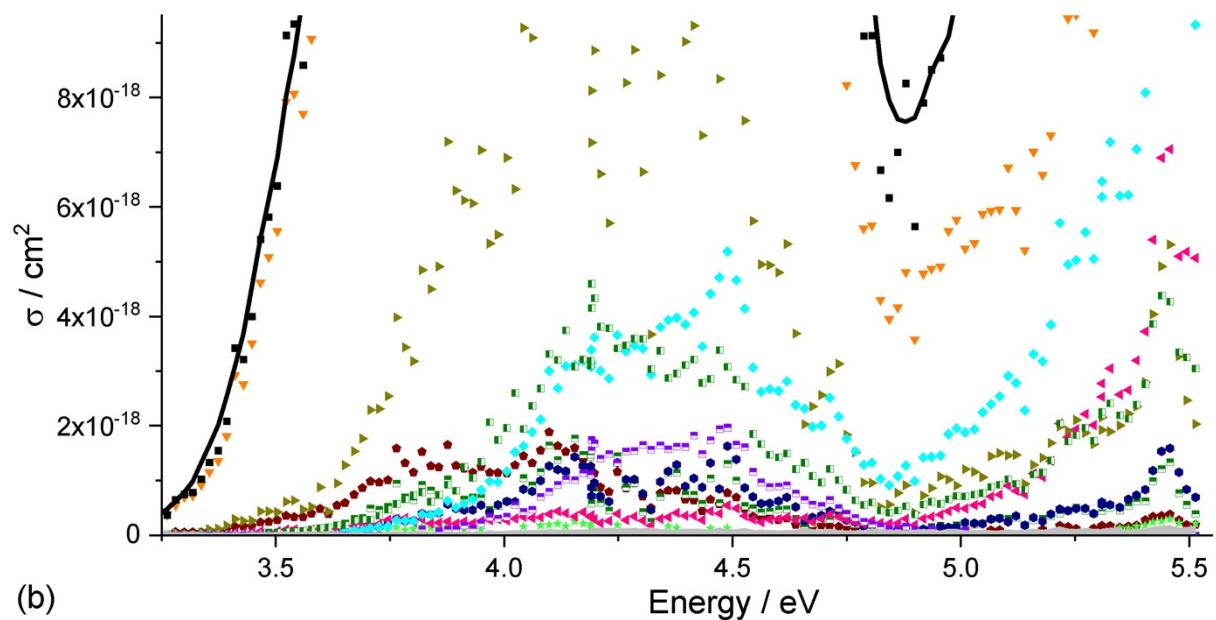

FIGURE S1. The partial cross sections of the detected fragments from  $\text{Cu(II)(NO}_3)_3^-$  in addition to the total dissociation cross section using a running average over eight points with values below 2.75 eV multiplied by 30 in a) and the UV absorption enlarged in b).

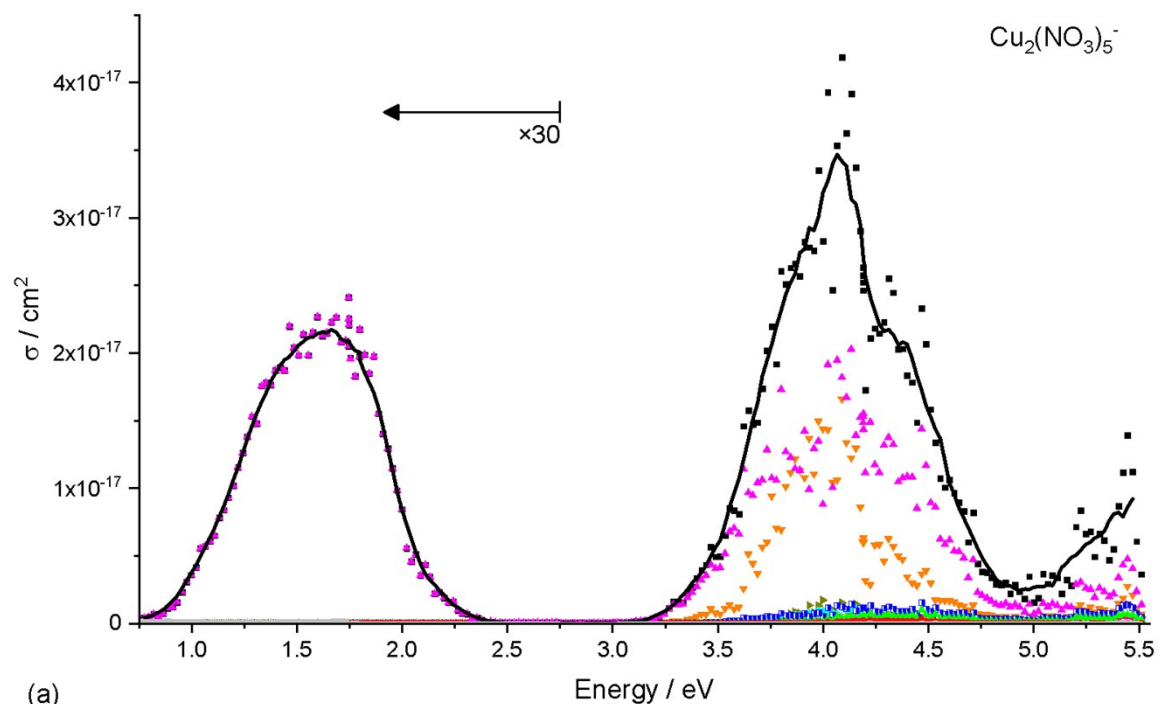

(a)

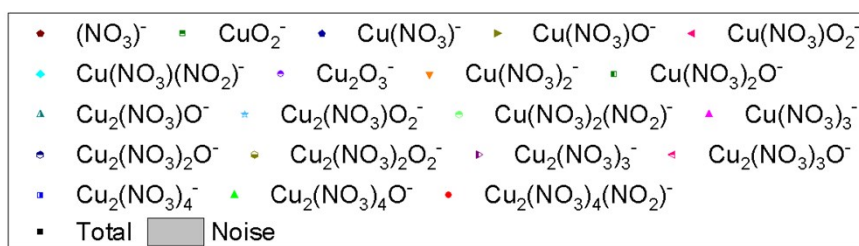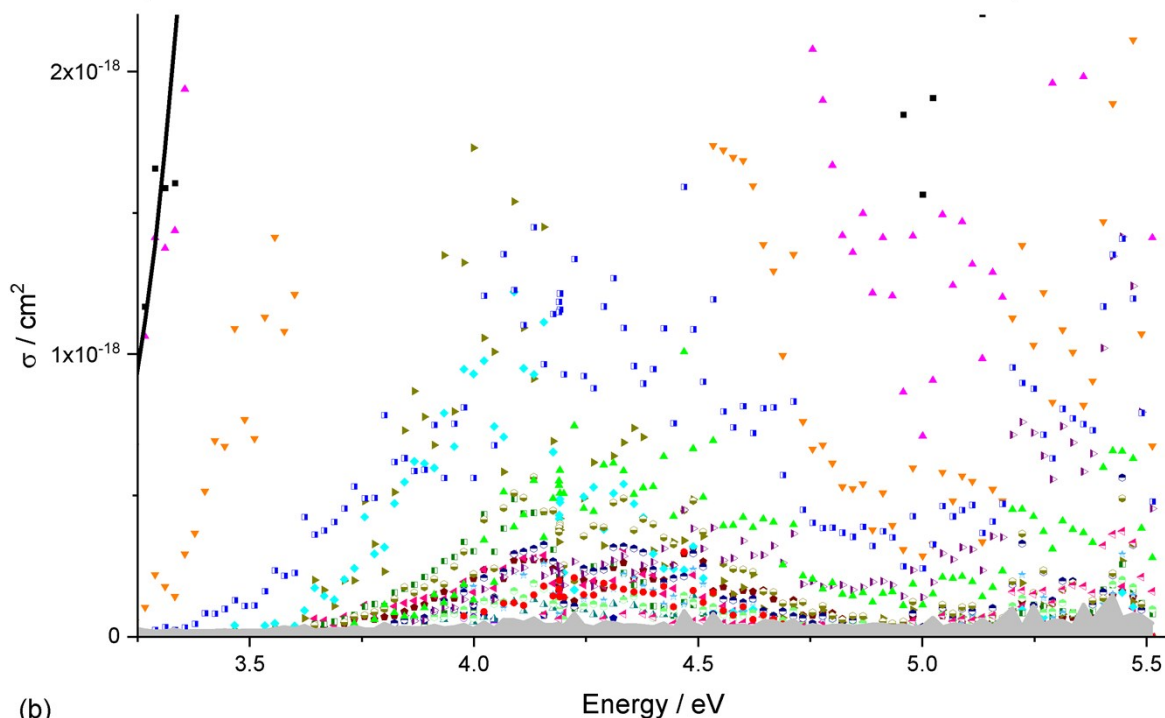

(b)

FIGURE S2. The partial cross sections of the detected fragments from  $\text{Cu(II)}_2(\text{NO}_3)_5^-$  in addition to the total dissociation cross section using a running average over eight points with values below 2.75 eV multiplied by 30 in a) and the UV absorption enlarged in b).

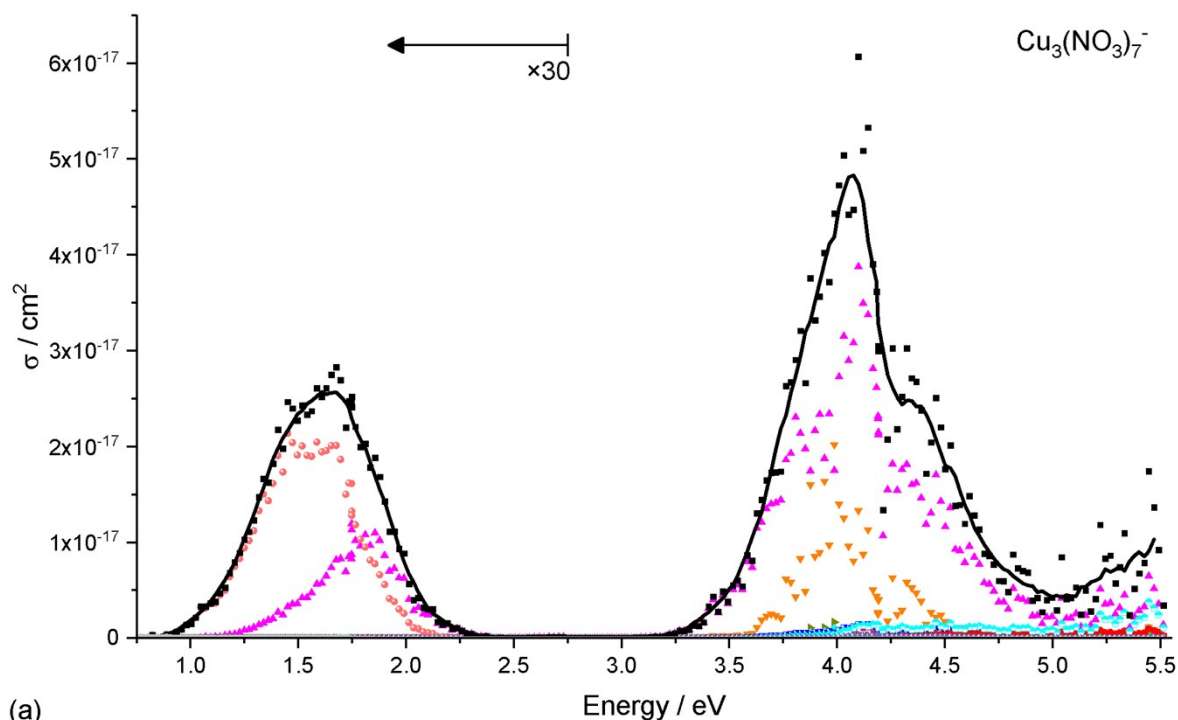

(a)

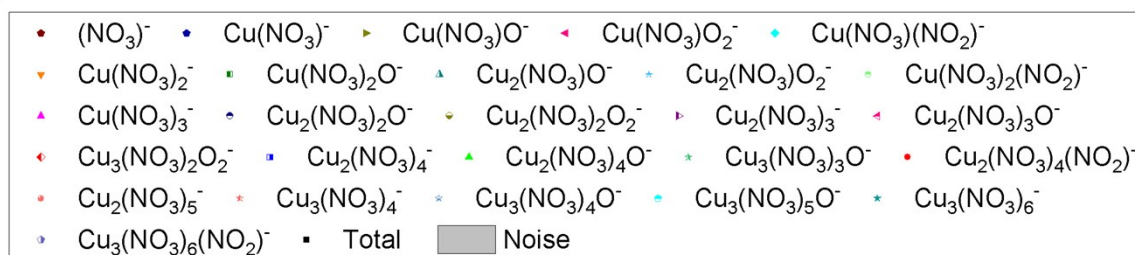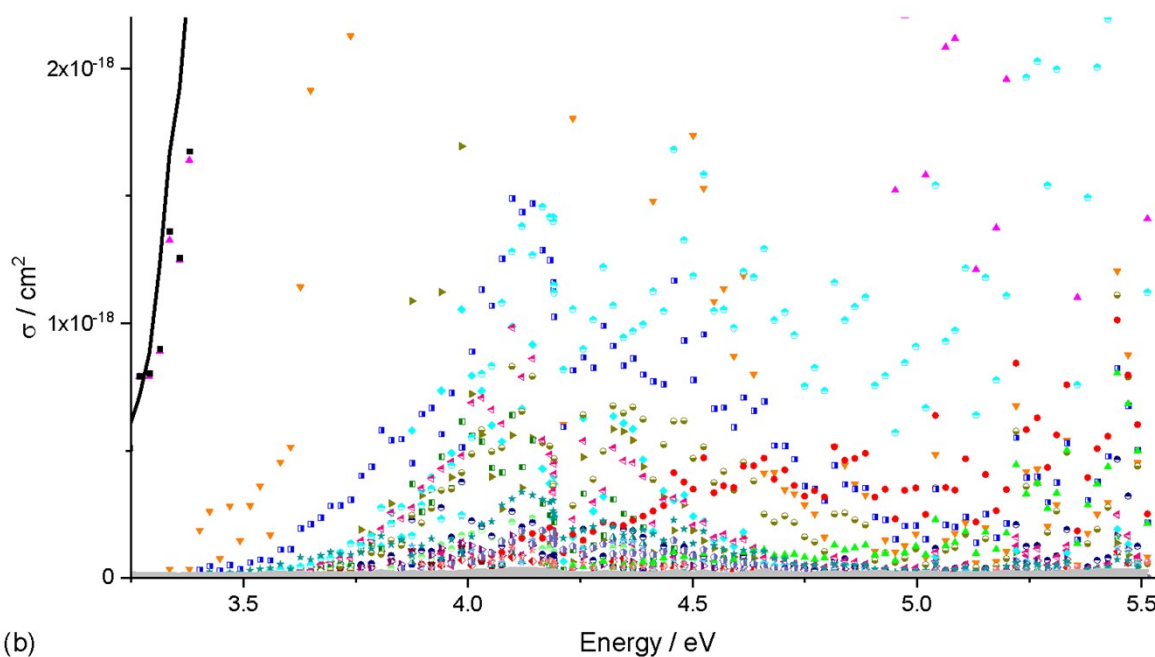

(b)

FIGURE S3. The partial cross sections of the detected fragments from Cu(II)<sub>3</sub>(NO<sub>3</sub>)<sub>7</sub><sup>-</sup> in addition to the total dissociation cross section using a running average over eight points with values below 2.75 eV multiplied by 30 in a) and the UV absorption enlarged in b).

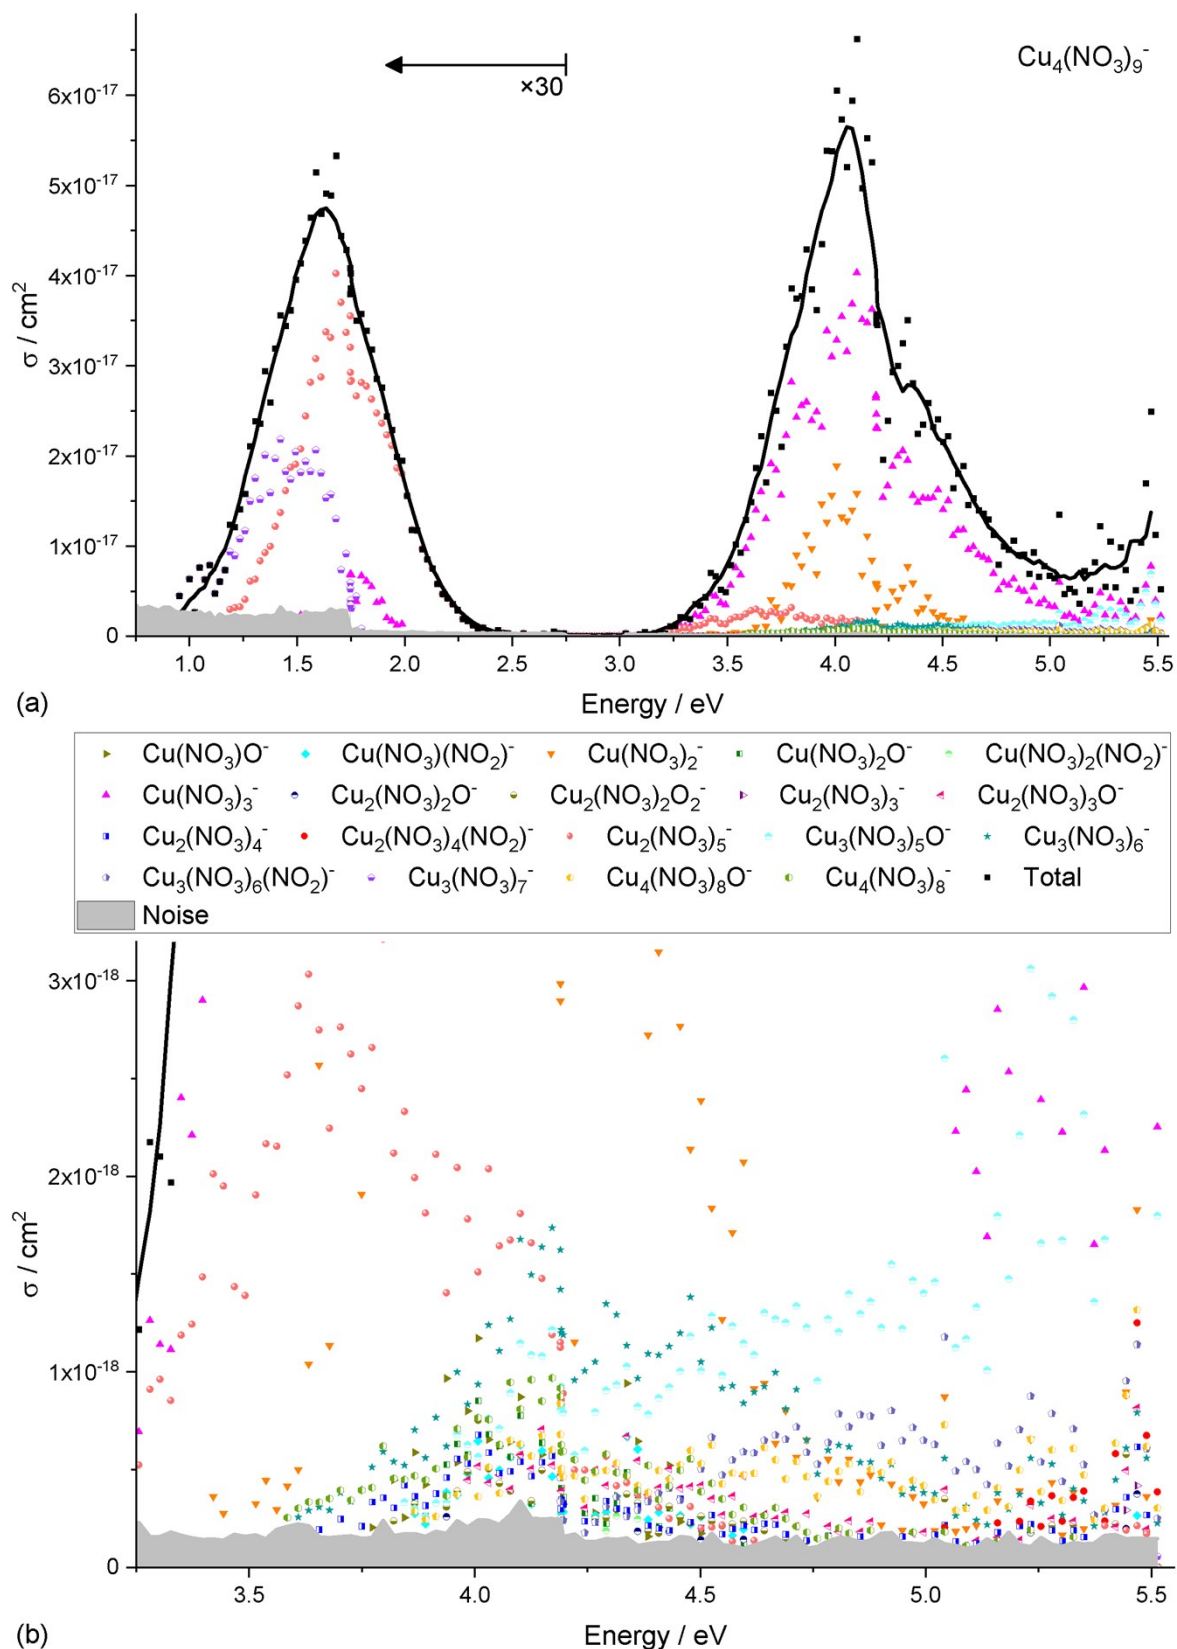

FIGURE S4. The partial cross sections of the detected fragments from  $\text{Cu}(\text{II})_4(\text{NO}_3)_9^-$  in addition to the total dissociation cross section using a running average over eight points with values below 2.75 eV multiplied by 30 in a) and the UV absorption enlarged in b).

TABLE S1. Benchmarking of the calculated transition energies  $E$  (in eV) and the corresponding oscillator strengths  $f$  in  $\text{Cu}(\text{NO}_3)_3^-$  with the TD-DFT functional TD-BMK against the EOM-CCSD method across multiple basis sets.

| 6-31+g* |        | BMK  |        | aug-cc-pVTZ |        | EOM-CCSD |        | aug-cc-pVDZ |        |
|---------|--------|------|--------|-------------|--------|----------|--------|-------------|--------|
| $E$     | $f$    | $E$  | $f$    | $E$         | $f$    | $E$      | $f$    | $E$         | $f$    |
| 1.08    | 0.0007 | 1.13 | 0.0006 | 1.17        | 0.0006 | 1.36     | 0.0000 | 1.49        | 0.0002 |
| 1.30    | 0.0001 | 1.32 | 0.0001 | 1.33        | 0.0001 | 1.44     | 0.0013 | 1.54        | 0.0011 |
| 1.47    | 0.0000 | 1.49 | 0.0001 | 1.52        | 0.0001 | 1.78     | 0.0001 | 1.88        | 0.0002 |
| 1.47    | 0.0001 | 1.50 | 0.0001 | 1.54        | 0.0001 | 1.78     | 0.0002 | 1.89        | 0.0001 |
| 4.02    | 0.0002 | 4.02 | 0.0001 | 4.08        | 0.0001 | 4.28     | 0.0001 | 4.30        | 0.0001 |
| 4.02    | 0.0000 | 4.02 | 0.0000 | 4.08        | 0.0000 | 4.28     | 0.0000 | 4.30        | 0.0000 |
| 4.11    | 0.0000 | 4.11 | 0.0000 | 4.16        | 0.0000 | 4.33     | 0.0000 | 4.37        | 0.0000 |
| 4.27    | 0.0000 | 4.27 | 0.0000 | 4.28        | 0.0000 | 4.54     | 0.0004 | 4.56        | 0.0003 |
| 4.27    | 0.0000 | 4.27 | 0.0000 | 4.29        | 0.0000 | 4.55     | 0.0001 | 4.57        | 0.0001 |
| 4.43    | 0.0001 | 4.43 | 0.0000 | 4.44        | 0.0000 | 4.76     | 0.0000 | 4.79        | 0.0000 |
| 4.45    | 0.0025 | 4.45 | 0.0006 | 4.50        | 0.0007 | 4.76     | 0.0000 | 4.79        | 0.0000 |
| 4.46    | 0.0007 | 4.46 | 0.0003 | 4.51        | 0.0003 | 4.85     | 0.0010 | 4.87        | 0.0007 |
| 4.68    | 0.0355 | 4.70 | 0.0009 | 4.74        | 0.0010 | 4.90     | 0.0000 | 4.94        | 0.0000 |
| 4.72    | 0.0207 | 4.90 | 0.0520 | 4.93        | 0.0536 | 5.16     | 0.0837 | 5.24        | 0.0797 |
| 4.83    | 0.0414 | 4.93 | 0.0002 | 4.98        | 0.0003 | 5.36     | 0.0471 | 5.41        | 0.0008 |
| 4.94    | 0.0000 | 5.03 | 0.0368 | 5.07        | 0.0375 | 5.41     | 0.0001 | 5.45        | 0.0433 |
| 5.04    | 0.0028 | 5.10 | 0.0005 | 5.15        | 0.0005 | 5.53     | 0.0023 | 5.55        | 0.0009 |
| 5.12    | 0.0004 | 5.11 | 0.0027 | 5.15        | 0.0025 | 5.58     | 0.0012 | 5.57        | 0.0022 |
| 5.13    | 0.0001 | 5.29 | 0.0036 | 5.32        | 0.0037 | 5.60     | 0.0008 | 5.66        | 0.0038 |
| 5.47    | 0.0000 | 5.48 | 0.0000 | 5.51        | 0.0000 | 5.86     | 0.0539 | 5.91        | 0.0454 |
| 5.47    | 0.0000 | 5.48 | 0.0000 | 5.51        | 0.0000 | 5.90     | 0.0000 | 5.92        | 0.0000 |
| 5.50    | 0.0007 | 5.51 | 0.0001 | 5.53        | 0.0001 | 5.90     | 0.0000 | 5.92        | 0.0008 |
| 5.50    | 0.0009 | 5.72 | 0.0008 | 5.76        | 0.0008 | 5.92     | 0.0029 | 5.95        | 0.0072 |
| 5.60    | 0.0696 | 5.79 | 0.0662 | 5.80        | 0.0659 | 6.03     | 0.0027 | 6.11        | 0.0012 |
| 5.74    | 0.0002 | 5.88 | 0.0014 | 5.91        | 0.0013 | 6.09     | 0.0003 | 6.11        | 0.0000 |
| 5.85    | 0.0014 | 5.89 | 0.0001 | 5.92        | 0.0001 | 6.09     | 0.0000 | 6.12        | 0.0022 |
| 5.87    | 0.0001 | 5.89 | 0.0000 | 5.92        | 0.0000 |          |        |             |        |
| 5.88    | 0.0001 | 5.94 | 0.0014 | 5.98        | 0.0008 |          |        |             |        |
| 5.90    | 0.0001 | 5.96 | 0.0002 | 6.02        | 0.0009 |          |        |             |        |
| 5.94    | 0.0010 | 6.09 | 0.0003 | 6.11        | 0.0002 |          |        |             |        |
| 5.99    | 0.0008 | 6.11 | 0.0021 | 6.19        | 0.0021 |          |        |             |        |
| 6.11    | 0.0024 | 6.21 | 0.0015 | 6.23        | 0.0018 |          |        |             |        |

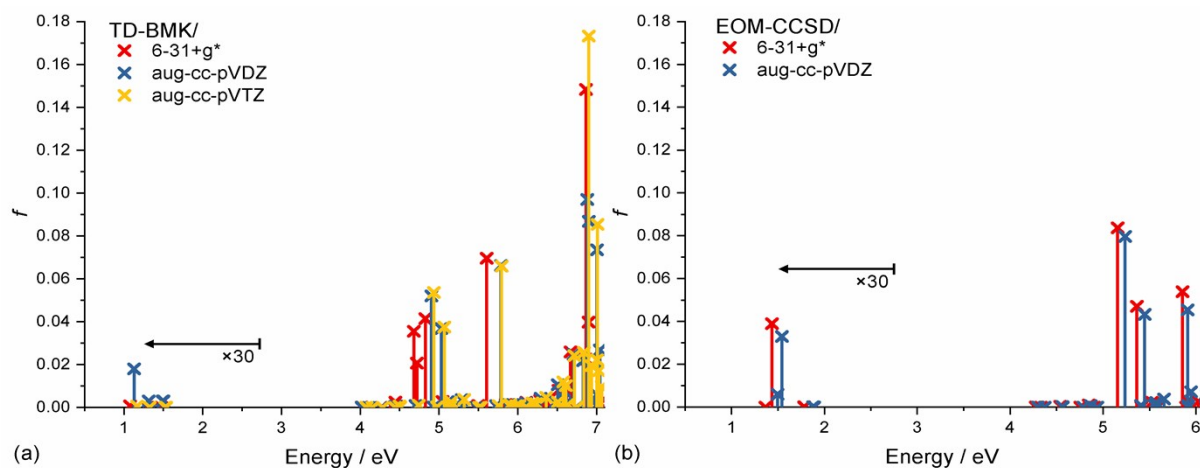

Figure S5. Benchmarking of the calculated transition energies and the corresponding oscillator strengths  $f$  in  $\text{Cu}(\text{NO}_3)_3^-$  with a) the TD-DFT functional TD-BMK and b) the EOM-CCSD method across multiple basis sets. The section below 2.75 eV has been scaled for better visibility.

**The optimized structure and zero-point corrected energy of the calculated ions and molecules on the B3LYP/def2TZVP level of theory in Å at the lowest possible spin multiplicity *M* (unless otherwise noted).**

Cu(NO3)(NO2)-  
E= -2126.330248  
O -0.641665 -1.418385 -0.000000  
N 0.258551 -2.362802 -0.000000  
O -0.136907 -3.525827 -0.000000  
Cu -0.000000 0.377506 0.000000  
O 0.656576 2.162872 0.000000  
N -0.204521 3.125046 0.000000  
O -1.379423 2.793771 0.000000  
O 1.454144 -2.047853 -0.000000

Cu(NO3)O2-  
E= -2071.507362  
O -0.877491 -1.035118 -0.000000  
Cu -0.000000 0.651378 0.000000  
O 0.755429 2.356692 0.000000  
N -0.133681 -2.107580 -0.000000  
O 1.095367 -1.983669 0.000000  
O -0.707014 -3.194559 -0.000000  
O -0.149320 3.339541 -0.000000

Cu(NO3)O-  
E= -1996.295308  
O 0.000000 -1.062551 0.000000  
N 1.304009 -1.144274 -0.000000  
O 1.797126 -2.271560 0.000000  
Cu -0.853732 0.642340 0.000000  
O -1.816860 2.115531 -0.000000  
O 1.973505 -0.108662 -0.000000

Cu(NO3)2  
E= -2201.420214  
Cu 0.000168 -0.000269 -0.000090  
N -2.384770 0.000113 0.000164  
O -3.571672 0.001022 -0.000040  
O -1.664121 -1.073208 0.000443  
O -1.662625 1.072594 -0.000251  
O 1.662763 -1.072769 -0.000491  
N 2.384855 0.000100 0.000141  
O 1.663424 1.073302 0.000203  
O 3.571548 -0.000153 0.000197

Cu(NO3)2-  
E= -2201.553981  
cu -0.000000 0.000000 0.000453  
o -0.590106 1.802345 0.000421  
o 0.590106 -1.802345 0.000421  
N 0.349082 2.711802 -0.000242  
o -0.000000 3.887593 -0.000570  
O 1.529842 2.346244 -0.000461  
N -0.349082 -2.711802 -0.000242  
o -0.000000 -3.887593 -0.000570  
O -1.529842 -2.346244 -0.000461

Cu(NO3)2(NO2)-  
E= -2406.743626  
O -3.286704 -1.609084 -0.035420  
N -2.217721 -1.045549 -0.043310  
O -1.245742 -1.399630 -0.780919  
Cu -0.080171 0.189503 0.022697  
O 1.647252 -1.330102 1.023000  
N 2.274400 -0.969448 0.011038  
O 3.400167 -1.344672 -0.265581  
O -1.974960 -0.027961 0.703241  
O 0.379052 1.910082 0.924303  
N 0.066526 2.858536 0.130362  
O -0.409224 2.514038 -0.944029  
O 1.672974 -0.137715 -0.792698

Cu(NO3)2O- *M*=3  
E= -2276.711734  
O -3.303791 -1.227627 0.045511  
N -2.241054 -0.648604 -0.020064  
O -1.203816 -1.155139 -0.546913  
Cu -0.101475 0.627925 -0.105159  
O 1.652964 -0.811983 1.158289  
N 2.269159 -0.605583 0.101132  
O 3.386744 -1.042677 -0.133547  
O -2.083525 0.538513 0.442269  
O 0.211508 2.399448 0.152642  
O 1.683170 0.120651 -0.807985

Cu(NO3)3 *M*=3  
E= -2481.766397  
Cu -0.000037 -0.000266 0.000034  
N 0.088594 2.439632 -0.000003  
O 0.131767 3.626305 -0.000042  
O -0.495966 1.745511 -0.911309  
O 0.621229 1.704932 0.911320  
O -1.264263 -1.302601 -0.911331  
N -2.157499 -1.142919 0.000029  
O -3.206949 -1.698583 0.000130  
O -1.787325 -0.314370 0.911226  
O 1.166522 -1.390791 0.911369  
N 2.068925 -1.296338 -0.000063  
O 1.759755 -0.443170 -0.911285  
O 3.075345 -1.926597 -0.000171

Cu(NO3)3-  
E= -2481.964553  
Cu 0.000000 0.000000 0.110006  
N 0.000000 0.000000 2.560382  
O 0.000000 0.000000 3.766082  
O 1.011326 0.358009 1.863722  
O -1.011326 -0.358009 1.863722  
O 1.287818 0.723546 -1.188068  
N 0.966087 1.981067 -1.318862  
O 1.617477 2.678408 -2.075080  
O 0.000000 2.388230 -0.649164  
O -1.287818 -0.723546 -1.188068  
N -0.966087 -1.981067 -1.318862  
O -0.000000 -2.388230 -0.649164  
O -1.617477 -2.678408 -2.075080

Cu2(NO3)4-  
E= -4403.011750  
O 0.935826 -1.610942 2.072772  
N 0.213370 -0.976339 1.340511  
O -1.034373 -0.879285 1.552762  
Cu -1.945300 0.187181 0.109984  
O -2.492794 1.797846 -1.051471  
N -2.300561 2.585131 -0.062821  
O -2.481585 3.769885 -0.111649  
O 0.655728 -0.359478 0.303370  
Cu 2.523917 -0.469756 -0.118067  
O 4.462393 1.328270 0.083530  
N 5.024096 0.374683 -0.472618  
O 4.307725 -0.697191 -0.720916  
O -1.892741 1.982808 0.999853  
O -2.258017 -1.320279 -1.083267  
N -3.479022 -1.678696 -0.775054  
O -4.036421 -1.010406 0.118638  
O -3.986764 -2.611002 -1.356529  
O 6.197889 0.367427 -0.804058

Cu2(NO3)4(NO2)-



E= -4608.196465  
O 1.117497 -1.700326 -0.688555  
N -0.094247 -1.488652 -0.578282  
O -0.368873 -0.319194 -0.170689  
Cu 2.268896 -0.094076 -0.197525  
Cu -2.279195 0.176501 0.006360  
O -3.468184 -1.841396 0.451535  
N -3.583577 -1.876152 -0.790914  
O -4.168474 -2.736720 -1.406354  
O -1.985378 1.513117 1.470966  
N -3.145694 2.045874 1.302647  
O -3.819265 1.509845 0.357335  
O -3.018871 -0.890402 -1.442756  
O 2.269624 0.806481 -1.978995  
N 2.836300 1.873574 -1.524903  
O 3.079793 1.831807 -0.275421  
O 2.575423 -0.643834 1.643447  
N 3.737018 -1.242588 1.569245  
O 4.257253 -1.288401 0.436129  
O 4.230177 -1.706093 2.572424  
O 3.102892 2.810731 -2.227551  
O -3.547359 2.957545 1.970888

Cu<sub>2</sub>(NO<sub>3</sub>)<sub>4</sub>O- M=4

E= -4478.188844  
Cu -1.477430 0.463809 -0.344739  
Cu -1.477408 -0.463994 -0.344737  
O 2.976511 0.550870 -1.369027  
N 3.866055 0.005219 -0.630689  
O 3.391732 -0.813412 0.234059  
O 5.042684 0.233103 -0.739518  
O 0.763101 -2.090473 0.503484  
N -0.361261 -2.178786 1.143428  
O -0.598669 -3.214212 1.732571  
O -1.152313 -1.212142 1.143251  
O -2.977146 -0.549667 -1.369561  
N -3.866346 -0.004478 -0.630469  
O -5.043068 -0.231958 -0.739223  
O -3.391602 0.813227 0.234892  
O -0.763017 2.089790 0.504569  
N 0.361585 2.178273 1.143932  
O 1.152475 1.211461 1.144009  
O 0.599427 3.213966 1.732451  
O -0.000064 -0.000081 -1.410534

Cu<sub>2</sub>(NO<sub>3</sub>)<sub>5</sub>-

E= -4683.415102  
N 0.014922 0.046730 -1.483941  
O 0.839512 0.166938 -2.367859  
O 0.362923 0.018566 -0.251608  
Cu 2.386069 0.150611 -0.111781  
O -1.218703 -0.057466 -1.734168  
Cu -2.343708 -0.276218 -0.067975  
O -2.198547 -2.263514 0.113107  
O -2.799072 1.605980 0.113236  
N -3.951916 1.667160 -0.503848  
O -4.533600 2.724967 -0.572581  
O -4.369601 0.593141 -0.985349  
N -2.740344 -2.255941 1.281905  
O -2.936526 -3.255156 1.915217  
O -3.046512 -1.084807 1.692169  
O 2.783579 -1.803164 -0.240935  
O 2.477809 2.085601 0.053033  
N 4.039154 -1.601647 -0.449708  
O 4.823657 -2.496020 -0.604985  
O 4.359290 -0.365739 -0.474336  
N 2.608153 2.230267 1.347887  
O 2.724135 3.338025 1.815157  
O 2.604373 1.172226 2.013259

(NO<sub>3</sub>)-

E=-280.470791  
N 0.000000 0.000000 0.000000  
O 0.000000 1.256426 -0.000000

O 1.088097 -0.628213 -0.000000  
O -1.088097 -0.628213 -0.000000

NO<sub>3</sub>

E=-280.335255  
N 0.000000 0.000000 0.000000  
O 0.000000 1.230539 -0.000000  
O 1.065678 -0.615269 -0.000000  
O -1.065678 -0.615269 -0.000000

O M=3

E= -75.096275  
O 0.000000 0.000000 0.000000

NO<sub>2</sub>

E= -205.158340  
N 0.000000 -0.000000 0.320860  
O 0.000000 -1.097677 -0.140376  
O 0.000000 1.097677 -0.140376

N<sub>2</sub>O<sub>5</sub>

E= -485.518864  
N 1.270142 0.009048 0.080105  
O 2.169098 0.621143 -0.389169  
O -0.000062 0.817237 -0.000027  
O 1.196575 -1.037700 0.631050  
N -1.270081 0.009107 -0.080147  
O -2.169000 0.621192 0.389192  
O -1.196665 -1.037757 -0.631009
